# Supplementary material
Source: Springer Nature journal article supplement (https://www.springermedizin.de/resource/supplementary/12913_2012_2130_MOESM1_ESM.pdf/9530040)
Supplement: MOESM1 [file 9530040]

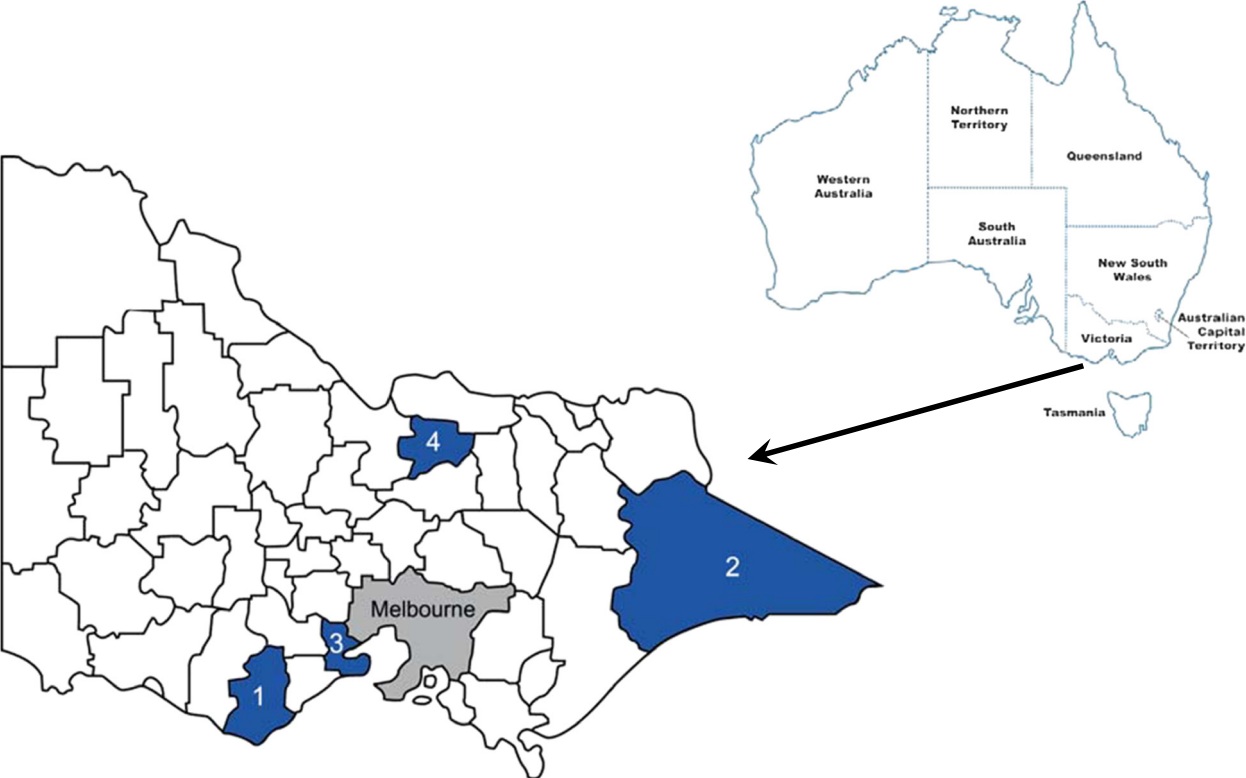

|                   | % aged $\geq 55$ years |                | % men       |                |
|-------------------|------------------------|----------------|-------------|----------------|
|                   | Population*            | Healthy Hearts | Population* | Healthy Hearts |
| 1. Colac          | 47                     | 50             | 46          | 48             |
| 2. East Gippsland | 50                     | 64             | 46          | 39             |
| 3. Geelong        | 33                     | 74             | 48          | 37             |
| 4. Shepparton     | 33                     | 64             | 47          | 46             |

\* based on place of usual residence [13]
